# Supplementary material for: Intravenous transplantation of olfactory ensheathing cells reduces neuroinflammation after spinal cord injury via interleukin-1 receptor antagonist
Source: PubMed Central journal article supplement (PMC7738890; doi:10.7150/thno.52197), 2021-01-01
Supplement: thnov11p1147s1.pdf [file thnov11p1147s1.pdf]

Supplementary Information for

Intravenous transplantation of olfactory ensheathing cells reduces neuroinflammation after spinal cord injury via interleukin-1 receptor antagonist

Lijian Zhang<sup>1,2</sup>, Xiaoqing Zhuang<sup>3, \*</sup>, Päivi Kotitalo<sup>4,5</sup>, Thomas Keller<sup>6</sup>, Anna Krzyczmonik<sup>6</sup>, Merja Haaparanta-Solin<sup>4,5</sup>, Olof Solin<sup>6,7,8</sup>, Sarita Forsback<sup>6,7</sup>, Tove J. Grönroos<sup>4,5</sup>, Chunlei Han<sup>9</sup>, Francisco R. López-Picón<sup>4,5, \*</sup>, Hechun Xia<sup>1, \*</sup>

1. Department of Neurosurgery, General Hospital of Ningxia Medical University, Yinchuan, Ningxia, China
2. Department of Neurosurgery, Affiliated Hospital of Hebei University, Baoding, Hebei, China
3. Department of Nuclear Medicine, General Hospital of Ningxia Medical University, Yinchuan, Ningxia, China
4. Preclinical Imaging Laboratory, Turku PET Centre, University of Turku, Turku, Finland
5. MediCity Research Laboratory, University of Turku, Turku, Finland
6. Radiopharmaceutical Chemistry Laboratory, Turku PET Centre, University of Turku, Turku, Finland
7. Department of Chemistry, University of Turku, Turku, Finland
8. Accelerator Laboratory, Turku PET Centre, Åbo Akademi University, Turku, Finland
9. Turku PET Centre, University of Turku, Turku, Finland

Xiaoqing Zhuang

Email: zhuangxq@nyfy.com.cn

Francisco R. López-Picón

Email: francisco.lopez@utu.f

Hechun Xia

Email: xhechun@nyfy.com.cn

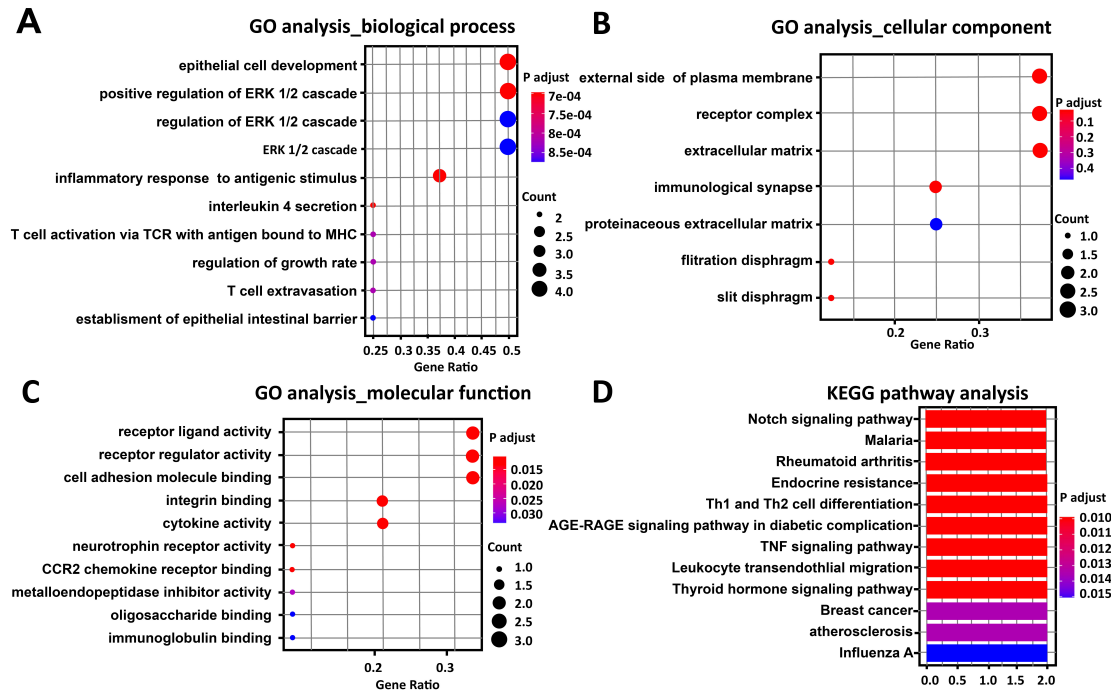

**Fig. S1.** GO enrichment and KEGG pathway analysis of differentially expressed proteins between the vehicle group and control group. a-c. The top 10 GO terms associated with biological process (A) cellular component (B) and molecular function (C) of differently expressed proteins are shown. D, KEGG pathway analysis for differently expressed proteins.

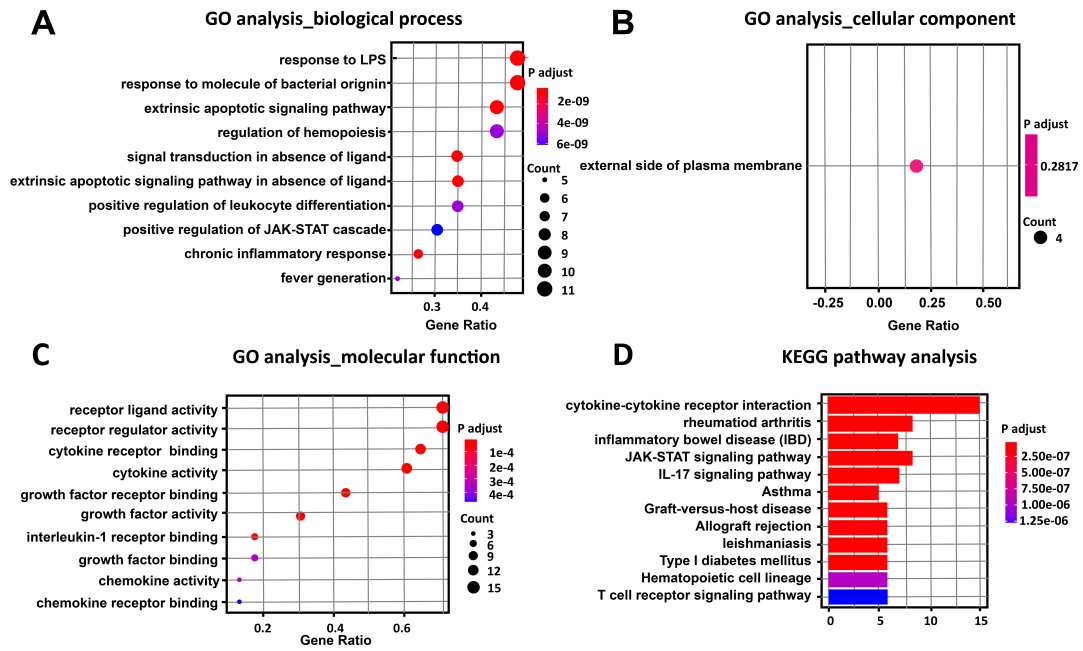

**Fig. S2.** GO enrichment and KEGG pathway analysis of differentially expressed proteins between the vehicle group and OEC group. (A-C) The top 10 GO terms associated with biological process (A), cellular component (B), and molecular function (C) of differentially expressed proteins are shown. (D) KEGG pathway analysis for differentially expressed proteins. LPS, Lipopolysaccharide.

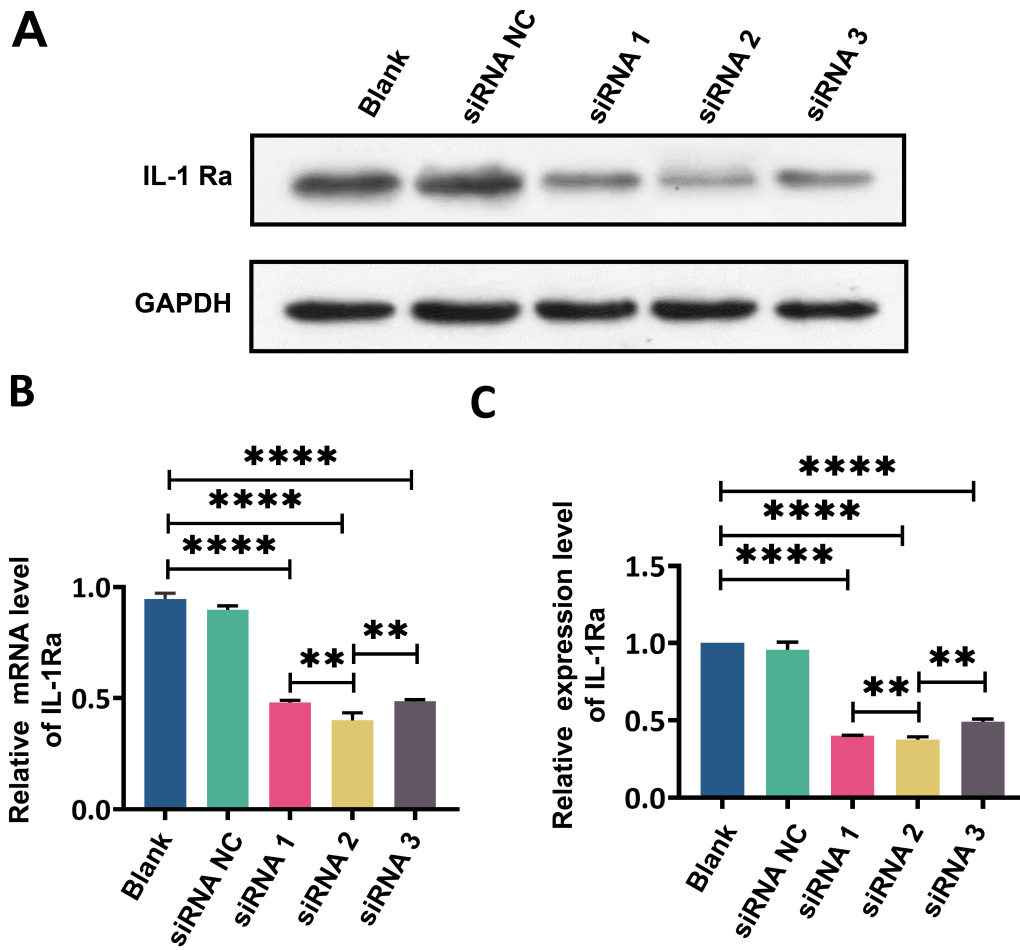

**Fig. S3.** Knockdown of IL-1Ra expression in OECs. (A) Western blot and quantification of IL-1 Ra expression in OECs following siRNA knockdown treatment. (B) Quantification of the mRNA level of IL-1Ra by PCR analysis. (C) Quantification of the IL-1Ra expression by western blot. \*\* $p < 0.01$ ; \*\*\*\* $p < 0.0001$ ,  $n = 3$ .

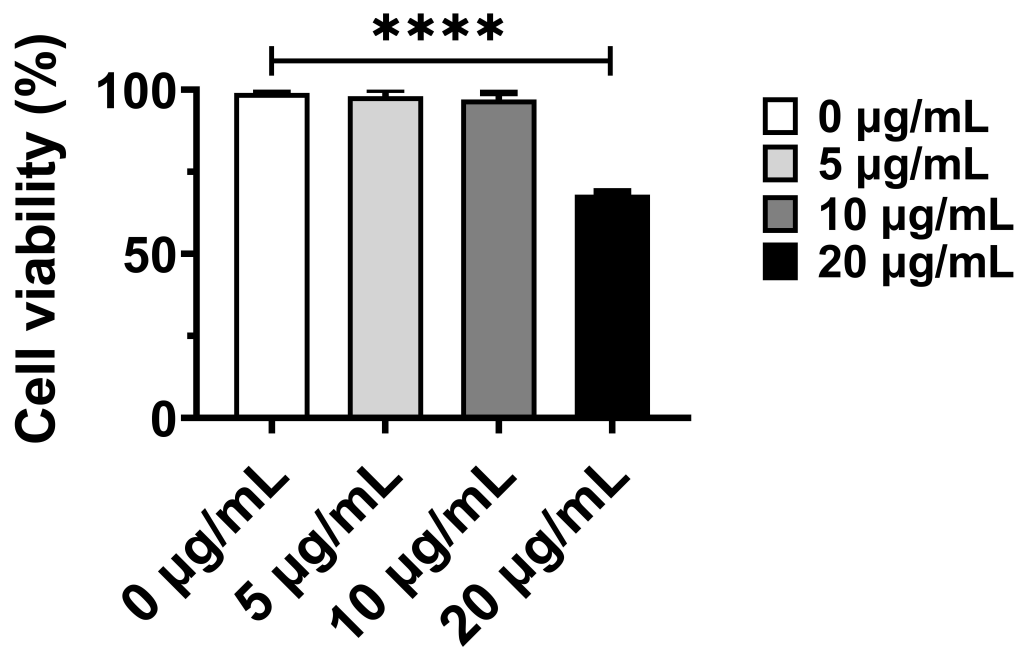

**Fig. S4.** Cell viability assay. The cytotoxicity of LPS to OECs was analysis with MTT assay. OECs were treated with different concentration of LPS. The data showed that 20 µg/mL could cause significant cytotoxicity to OECs. \*\*\* $p < 0.001$ ,  $n = 3$ .

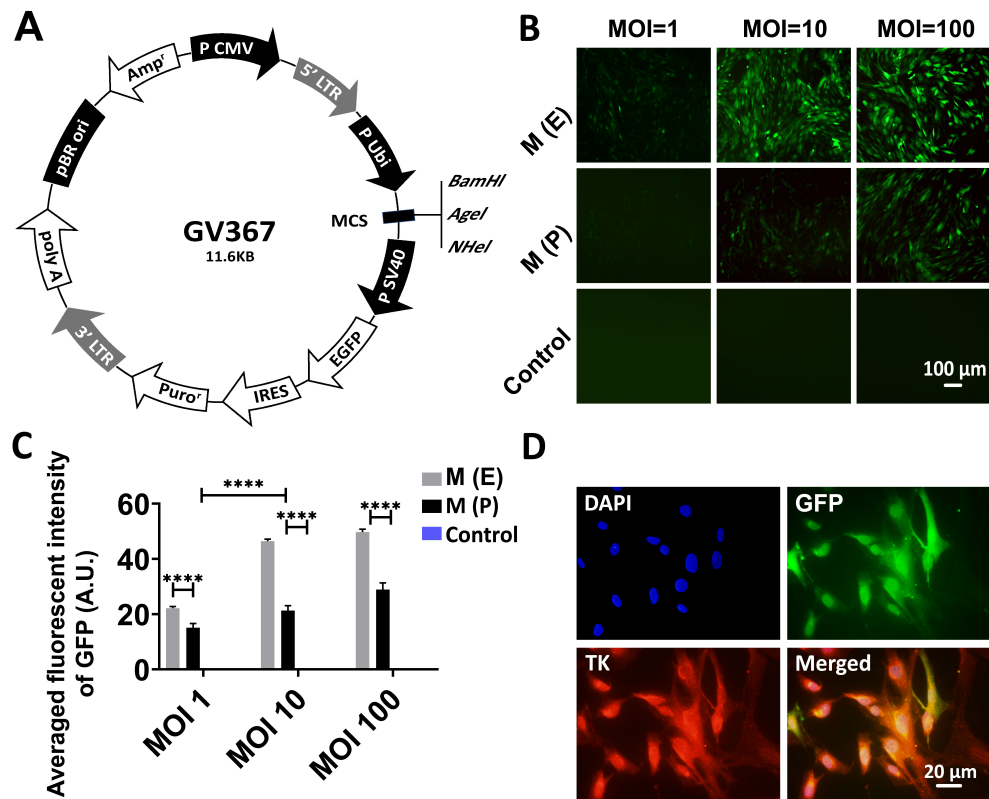

**Fig. S5.** Construction and identification of lentivirus-mediated HSV1-tk overexpression in OECs. **(A)** Schematic representation of lentivirus vector GV367. **(B)** Optimization of cell transfection conditions with LV-HSV1-TK. M (E): in complete medium supplement with Enhanced Infection Solution; M (P) in complete medium supplement with polybrene (scale = 100  $\mu$ m). **(C)** Quantification of GFP fluorescence intensity under different transduction conditions. **(D)** LV-HSV1-TK (MOI = 10) facilitated HSV1-tk over-expression in OECs at 96 h post-transduction as verified by immunocytofluorescence. \*\*\*\* $p < 0.0001$ ,  $n = 5$ . Scale = 20  $\mu$ m.

**Table S1.** The list of differentially expressed proteins between vehicle group and control group.

| <b>entrez ID</b> | <b>protein ID</b> | <b>Values_ vehicle group</b> | <b>Values_ control group</b> | <b>log2FC</b> | <b>p value</b> |
|------------------|-------------------|------------------------------|------------------------------|---------------|----------------|
| 25464            | ICAM-1            | 8281.25 ±1685.02             | 4973.31±689.14               | 0.735526      | 0.0135         |
| 24770            | MCP-1             | 8097.86 ±1993.63             | 4686.61±592.64               | 0.788866      | 0.0240         |
| 116510           | TIMP-1            | 14674.5943±186.82            | 1214.88±186.82               | 3.59334       | 0.0163         |
| 83781            | Galectin-3        | 26711.18 ±6766.36            | 7379.32±2714.61              | 1.855743      | 9.58E-06       |
| 25454            | GFR $\alpha$ -1   | 2295.74 ±245.82              | 1840.35±123.83               | 0.318823      | 0.0166         |
| 116479           | JAM-A             | 907.79 ±151.03               | 579.43±134.28                | 0.646827      | 0.0119         |
| 25496            | Notch-1           | 2475.36 ±313.46 1            | 1557.32±202.258              | 0.668238      | 0.0018         |
| 29492            | Notch-2           | 5579.96 ±624.22              | 3547.58±469.951              | 0.65327       | 0.0010         |

n=5 per group

**Table S2.** The list of differentially expressed proteins between vehicle group and OEC group.

| entrez ID | protein ID    | Values_ OEC group | Values_ vehicle group | log2FC   | p value  |
|-----------|---------------|-------------------|-----------------------|----------|----------|
| 56822     | B7-2          | 2199.48±318.69    | 2906.88±130.51        | -0.40215 | 0.0081   |
| 310738    | b-NGF         | 1263.14±292.04    | 1766.82±139.50        | -0.4838  | 0.0220   |
| 116630    | GM-CSF        | 2127.27±88.23     | 2713.69±129.25        | -0.3511  | 0.0001   |
| 25712     | IFN $\gamma$  | 2025.79±96.39     | 2542.39±120.14        | -0.32755 | 0.0001   |
| 24493     | IL-1 $\alpha$ | 1125.08±60.51     | 1423.16±95.01         | -0.3388  | 0.0012   |
| 24494     | IL-1 $\beta$  | 1662.91±235.28    | 2094.22±51.97         | -0.33252 | 0.0198   |
| 116562    | IL-2          | 1148.19±146.36    | 1445.81±128.67        | -0.33225 | 0.0160   |
| 287287    | IL-4          | 2572.32±62.57     | 3420.95±228.74        | -0.41119 | 0.0011   |
| 25325     | IL-10         | 1649.18±142.12    | 2017.38±142.60        | -0.29057 | 0.0064   |
| 60665     | LIX           | 2922.85±113.71    | 3649.18±80.91         | -0.3201  | 1.32E-05 |
| 25266     | PDGF-AA       | 3894.12±360.12    | 4953.65±358.91        | -0.34711 | 0.0031   |
| 24684     | Prolactin R   | 843.73±149.78     | 1210.77±91.33         | -0.52054 | 0.0046   |
| 24835     | TNF $\alpha$  | 2283.99±116.40    | 2907.36±212.95        | -0.34802 | 0.0019   |
| 83785     | VEGF          | 778.06±144.79     | 1009.01±69.72         | -0.37456 | 0.0296   |
| 362505    | CTACK         | 1386.02±101.22    | 1728.56±163.10        | -0.31842 | 0.0098   |
| 29397     | Eotaxin       | 1557.26±128.15    | 1929.14±166.87        | -0.30877 | 0.0085   |
| 64535     | FGF-BP        | 926.86±85.90      | 1168.37±148.41        | -0.33375 | 0.0284   |
| 60582     | IL-1 ra       | 666.09±235.56     | 175.97±88.98          | 1.914345 | 0.0109   |
| 24495     | IL-3          | 963.315±32.83     | 1158.62±104.75        | -0.26609 | 0.0175   |
| 116479    | JAM-A         | 532.45±166.11     | 907.79±151.03         | -0.76861 | 0.0103   |
| 81527     | Neuropilin-2  | 849.05 ±56.51     | 1071.98±134.67        | -0.33599 | 0.0258   |
| 25496     | Notch-1       | 1607.81±380.82    | 2475.36±313.46        | -0.62224 | 0.0083   |
| 29492     | Notch-2       | 3682.22±605.67    | 5579.96±624.22        | -0.59955 | 0.0024   |

n=5 per group



**Table S3.** Gene ontology (GO) functional enrichment analysis for the differentially expressed proteins (DEPs) between vehicle group and OEC group.

| ID                        | Description                                                | P value  | p. adjust | Gene ID                                                               | Enrich factor |
|---------------------------|------------------------------------------------------------|----------|-----------|-----------------------------------------------------------------------|---------------|
| <b>Biological process</b> |                                                            |          |           |                                                                       |               |
| GO:0032496                | response to LPS (lipopolysaccharide)                       | 2.39E-12 | 1.12E-09  | Cd86, Ngf, Csf2, Ifng, Il1a, Il1b, Il10, Cxcl6, Tnf, Il1rn,<br>Notch1 | 18.96427      |
| GO:0071219                | cellular response to molecule of bacterial origin          | 1.39E-08 | 6.03E-07  | Cd86, Csf2, Ifng, Il1b, Il10, Cxcl6, Tnf                              | 22.86333      |
| GO:0097191                | extrinsic apoptotic signaling pathway                      | 9.21E-14 | 7.21E-11  | Ngf, Csf2, Ifng, Il1a, Il1b, Il2, Il4, Tnf, Vegfa, Il3                | 34.10075      |
| GO:1903708                | positive regulation of hemopoiesis                         | 8.29E-11 | 1.22E-08  | Csf2, Ifng, Il1b, Il2, Il4, Tnf, Il3, Notch2                          | 31.435        |
| GO:0038034                | signal transduction in absence of ligand                   | 4.36E-14 | 5.12E-11  | Ngf, Csf2, Il1a, Il1b, Il2, Il4, Tnf, Il3                             | 79.39353      |
| GO:0097192                | extrinsic apoptotic signaling pathway in absence of ligand | 4.36E-14 | 5.12E-11  | Ngf, Csf2, Il1a, Il1b, Il2, Il4, Tnf, Il3                             | 79.39353      |
| GO:1902107                | positive regulation of leukocyte differentiation           | 1.34E-11 | 3.49E-09  | Csf2, Ifng, Il1b, Il2, Il4, Tnf, Il3, Notch2                          | 39.44392      |
| GO:0002544                | chronic inflammatory response                              | 1.06E-12 | 6.25E-10  | Il1b, Il4, Il10, Tnf, Ccl11, Il1rn                                    | 160.1559      |
| GO:0001660                | fever generation                                           | 9.77E-12 | 3.28E-09  | Il1a, Il1b, Tnf, Il1rn, Il3                                           | 241.9022      |

**Molecular function**

|                           |                                  |          |          |                                                                                                 |          |
|---------------------------|----------------------------------|----------|----------|-------------------------------------------------------------------------------------------------|----------|
| GO:0048018                | receptor ligand activity         | 5.36E-21 | 1.36E-19 | Ngf, Csf2, Ifng, Il1a, Il1b, Il2, Il4, Il10, Cxcl6, Pdgfa, Tnf, Vegfa, Ccl27, Ccl11, Il1rn, Il3 | 27.18185 |
| GO:0030545                | receptor regulator activity      | 1.69E-20 | 3.21E-19 | Ngf, Csf2, Ifng, Il1a, Il1b, Il2, Il4, Il10, Cxcl6, Pdgfa, Tnf, Vegfa, Ccl27, Ccl11, Il1rn, Il3 | 25.31127 |
| GO:0005126                | cytokine receptor binding        | 9.78E-22 | 3.72E-20 | Ngf, Csf2, Ifng, Il1a, Il1b, Il2, Il4, Il10, Cxcl6, Tnf, Vegfa, Ccl27, Ccl11, Il1rn, Il3        | 38.04873 |
| GO:0005125                | cytokine activity                | 8.40E-23 | 6.39E-21 | Csf2, Ifng, Il1a, Il1b, Il2, Il4, Il10, Cxcl6, Tnf, Vegfa, Ccl27, Ccl11, Il1rn, Il3             | 58.18374 |
| GO:0070851                | growth factor receptor binding   | 1.31E-15 | 1.99E-14 | Csf2, Il1a, Il1b, Il2, Il4, Il10, Pdgfa, Vegfa, Il1rn/Il3                                       | 51.80343 |
| GO:0008083                | growth factor activity           | 5.54E-10 | 7.02E-09 | Ngf, Csf2, Il2, Il4, Pdgfa, Vegfa, Il3                                                          | 36.2624  |
| GO:0005149                | interleukin-1 receptor binding   | 7.84E-09 | 8.51E-08 | Il1a, Il1b, Il1rn, Il3                                                                          | 163.4686 |
| GO:0019838                | growth factor binding            | 4.15E-05 | 0.00035  | Pdgfa, Vegfa, Fgfbp1, Il1rn                                                                     | 20.15366 |
| GO:0042379                | chemokine receptor binding       | 6.12E-05 | 0.000465 | Cxcl6, Ccl27, Ccl11                                                                             | 38.71625 |
| GO:0008009                | chemokine activity               | 1.65E-05 | 0.000157 | Cxcl6, Ccl27, Ccl11                                                                             | 59.64395 |
| <b>Cellular component</b> |                                  |          |          |                                                                                                 |          |
| GO:0009897                | external side of plasma membrane | 0.000655 | 0.028174 | Cd86, Ifng, Il4, Tnf                                                                            | 9.820785 |

Notes: Category refers to the GO functional categories.

**Table S4.** The map of protein array.**CYT-3**

|          | 1             | 2 | 3 | 4 | 1             | 2 | 3 | 4 | 1            | 2 | 3 | 4 |
|----------|---------------|---|---|---|---------------|---|---|---|--------------|---|---|---|
| <b>A</b> | POS1          |   |   |   | POS2          |   |   |   | NEG          |   |   |   |
| <b>B</b> | CD86          |   |   |   | Beta-NGF      |   |   |   | CXCL1        |   |   |   |
| <b>C</b> | CINC-2        |   |   |   | CINC-3        |   |   |   | CNTF         |   |   |   |
| <b>D</b> | Fractalkine   |   |   |   | GM-CSF        |   |   |   | ICAM-1       |   |   |   |
| <b>E</b> | IFN- $\gamma$ |   |   |   | IL-1 $\alpha$ |   |   |   | IL-1 $\beta$ |   |   |   |
| <b>F</b> | IL-2          |   |   |   | IL-4          |   |   |   | IL-6         |   |   |   |
| <b>G</b> | IL-10         |   |   |   | IL-13         |   |   |   | LIX          |   |   |   |
| <b>H</b> | L-Selectin    |   |   |   | MCP-1         |   |   |   | PDGF-AA      |   |   |   |
| <b>I</b> | Prolactin R   |   |   |   | RAGE          |   |   |   | CXCL-7       |   |   |   |
| <b>J</b> | TIMP-1        |   |   |   | TNF- $\alpha$ |   |   |   | VEGF-A       |   |   |   |

**CYT-4**

|          | 1           | 2 | 3 | 4 | 1              | 2 | 3 | 4 | 1               | 2 | 3 | 4 |
|----------|-------------|---|---|---|----------------|---|---|---|-----------------|---|---|---|
| <b>A</b> | POS1        |   |   |   | POS2           |   |   |   | CD137           |   |   |   |
| <b>B</b> | Activin A   |   |   |   | Adiponectin    |   |   |   | B7-1            |   |   |   |
| <b>C</b> | CD48        |   |   |   | CCL27          |   |   |   | Decorin         |   |   |   |
| <b>D</b> | Eotaxin-1   |   |   |   | EphA5          |   |   |   | Erythropoietin  |   |   |   |
| <b>E</b> | FGF-BP      |   |   |   | Flt-3 Ligand   |   |   |   | Galectin-1      |   |   |   |
| <b>F</b> | Galectin-3  |   |   |   | Gas-1          |   |   |   | GFR $\alpha$ -1 |   |   |   |
| <b>G</b> | Gp130       |   |   |   | HGF            |   |   |   | IL-1R6          |   |   |   |
| <b>H</b> | IL-1Ra      |   |   |   | IL-2R $\alpha$ |   |   |   | IL-3            |   |   |   |
| <b>I</b> | IL-7        |   |   |   | IL-17F         |   |   |   | IL-22           |   |   |   |
| <b>J</b> | JAM-A       |   |   |   | MIP-1 $\alpha$ |   |   |   | Neuropilin-1    |   |   |   |
| <b>K</b> | Neuroilin-2 |   |   |   | Nope           |   |   |   | Notch-1         |   |   |   |
| <b>L</b> | Notch-2     |   |   |   | P-Cadherin     |   |   |   | Prolactin       |   |   |   |
| <b>M</b> | RANTES      |   |   |   | SCF            |   |   |   | TIM-1           |   |   |   |
| <b>N</b> | TIMP-2      |   |   |   | TREM-1         |   |   |   | TWEAKR          |   |   |   |

**Table S5.** Pathway enrichment analysis for the differentially expressed proteins (DEPs) between SCI group and control group.

| <b>Category</b> | <b>Term</b>                                          | <b>p value</b> | <b>p.adjust</b> | <b>geneID</b>  | <b>Enrich_factor</b> |
|-----------------|------------------------------------------------------|----------------|-----------------|----------------|----------------------|
| rno04330        | Notch signaling pathway                              | 0.0005346      | 0.009995        | Notch1, Notch2 | 54.87179             |
| rno05144        | Malaria                                              | 0.0007118      | 0.009995        | Icam1, Ccl2    | 47.55556             |
| rno05323        | Rheumatoid arthritis                                 | 0.0016665      | 0.009995        | Icam1, Ccl2    | 31.01449             |
| rno01522        | Endocrine resistance                                 | 0.0017026      | 0.009995        | Notch1, Notch2 | 30.681               |
| rno04658        | Th1 and Th2 cell differentiation                     | 0.0017391      | 0.009995        | Notch1, Notch2 | 30.35461             |
| rno04933        | AGE-RAGE signaling pathway in diabetic complications | 0.0020443      | 0.009995        | Icam1, Ccl2    | 27.97386             |
| rno04668        | TNF signaling pathway                                | 0.0024161      | 0.009995        | Icam1, Ccl2    | 25.70571             |
| rno04670        | Leukocyte transendothelial migration                 | 0.002591       | 0.009995        | Icam1, F11r    | 24.81159             |
| rno04919        | Thyroid hormone signaling pathway                    | 0.002726       | 0.009995        | Notch1, Notch2 | 24.18079             |
| rno05224        | Breast cancer                                        | 0.004312       | 0.013451        | Notch1, Notch2 | 19.14989             |
| rno05164        | Influenza A                                          | 0.0056451      | 0.015159        | Icam1, Ccl2    | 16.68616             |
| rno04514        | Cell adhesion molecules (CAMs)                       | 0.0059717      | 0.015159        | Icam1, F11r    | 16.21212             |
| rno05206        | MicroRNAs in cancer                                  | 0.0137684      | 0.032454        | Notch1, Notch2 | 10.52891             |

Notes: Category refers to the pathway functional categories.

**Table S6.** Pathway enrichment analysis for the differentially expressed proteins (DEPs) between vehicle group and OEC group.

| Category | Term                                   | p value  | p. adjust | Gene ID                                                                                    | Enrich factor |
|----------|----------------------------------------|----------|-----------|--------------------------------------------------------------------------------------------|---------------|
| rno04060 | Cytokine-cytokine receptor interaction | 8.97E-19 | 9.42E-17  | Ngf, Csf2, Ifng, Il1a, Il1b, Il2, Il4, Il10, Cxcl6, Prlr, Tnf, Ccl27,<br>Ccl11, Il1rn, Il3 | 22.72969      |
| rno05323 | Rheumatoid arthritis                   | 2.37E-11 | 1.25E-09  | Cd86, Csf2, Ifng, Il1a, Il1b, Cxcl6, Tnf, Vegfa                                            | 35.44513      |
| rno05321 | Inflammatory bowel disease (IBD)       | 1.25E-10 | 4.37E-09  | Ifng, Il1a, Il1b, Il2, Il4, Il10, Tnf                                                      | 43.23232      |
| rno04630 | JAK-STAT signaling pathway             | 1.61E-09 | 3.57E-08  | Csf2, Ifng, Il2, Il4, Il10, Pdgfa, Prlr/Il3                                                | 21.0384       |
| rno04657 | IL-17 signaling pathway                | 1.70E-09 | 3.57E-08  | Csf2, Ifng, Il1b, Il4, Cxcl6, Tnf, Ccl11                                                   | 30.03509      |
| rno05310 | Asthma                                 | 1.21E-08 | 1.94E-07  | Il4, Il10, Tnf, Ccl11, Il3                                                                 | 61.76046      |
| rno05332 | Graft-versus-host disease              | 1.29E-08 | 1.94E-07  | Cd86, Ifng, Il1a, Il1b, Il2, Tnf                                                           | 34.44668      |
| rno05330 | Allograft rejection                    | 1.66E-08 | 2.11E-07  | Cd86, Ifng, Il2, Il4, Il10, Tnf                                                            | 33.05019      |
| rno05140 | Leishmaniasis                          | 1.81E-08 | 2.11E-07  | Ifng, Il1a, Il1b, Il4, Il10, Tnf                                                           | 32.60952      |
| rno04940 | Type I diabetes mellitus               | 2.67E-08 | 2.81E-07  | Cd86, Ifng, Il1a, Il1b, Il2, Tnf                                                           | 30.57143      |
| rno04640 | Hematopoietic cell lineage             | 8.57E-08 | 8.18E-07  | Csf2, Il1a, Il1b, Il4, Tnf, Il3                                                            | 25.21355      |
| rno04660 | T cell receptor signaling pathway      | 1.46E-07 | 1.28E-06  | Csf2, Ifng, Il2, Il4, Il10, Tnf                                                            | 23.07278      |

Notes: Category refers to the pathway functional categories.

**Table S7.** Gene ontology (GO) functional enrichment analysis for the differentially expressed proteins (DEPs) between vehicle group and control group.

| ID                        | Description                                                                                                 | p value   | p. adjust | Gene ID                     | Enrich factor |
|---------------------------|-------------------------------------------------------------------------------------------------------------|-----------|-----------|-----------------------------|---------------|
| <b>Biological process</b> |                                                                                                             |           |           |                             |               |
| GO:0002064                | epithelial cell development                                                                                 | 2.20E-06  | 0.000699  | Icam1, F11r, Notch1, Notch2 | 36.93776      |
| GO:0070374                | positive regulation of ERK1 and ERK2 cascade                                                                | 2.42E-06  | 0.000699  | Icam1, Ccl2, Notch1, Notch2 | 36.04049      |
| GO:0070372                | regulation of ERK1 and ERK2 cascade                                                                         | 7.03E-06  | 0.000872  | Icam1, Ccl2, Notch1, Notch2 | 27.56037      |
| GO:0070371                | ERK1 and ERK2 cascade                                                                                       | 8.81E-06  | 0.000875  | Icam1, Ccl2, Notch1, Notch2 | 26.02924      |
| GO:0002437                | inflammatory response to antigenic stimulus                                                                 | 2.81E-06  | 0.000699  | Icam1, Notch1, Notch2       | 99.64925      |
| GO:0072602                | interleukin-4 secretion                                                                                     | 2.65E-06  | 0.000699  | Notch1, Notch2              | 741.8333      |
| GO:0002291                | T cell activation via T cell receptor contact with antigen bound to MHC molecule on antigen presenting cell | 3.71E-06  | 0.000736  | Icam1, Lgals3               | 635.8571      |
| GO:0040009                | regulation of growth rate                                                                                   | 4.94E-06  | 0.000818  | Notch1, Notch2              | 556.375       |
| GO:0072683                | T cell extravasation                                                                                        | 6.35E-06  | 0.000872  | Icam1, Ccl2                 | 494.5556      |
| GO:0090557                | establishment of endothelial intestinal barrier                                                             | 7.94E-06  | 0.000875  | Icam1, F11r                 | 445.1         |
| <b>Cellular component</b> |                                                                                                             |           |           |                             |               |
| GO:0036056                | filtration diaphragm                                                                                        | 0.0034508 | 0.024155  | F11r                        | 289.4063      |
| GO:0036057                | slit diaphragm                                                                                              | 0.0034508 | 0.024155  | F11r                        | 289.4063      |

|                           |                                         |           |          |                       |          |
|---------------------------|-----------------------------------------|-----------|----------|-----------------------|----------|
| GO:0001772                | immunological synapse                   | 9.09E-05  | 0.00382  | Icam1, Lgals3         | 136.1912 |
| GO:0009897                | external side of plasma membrane        | 0.0002885 | 0.005938 | Icam1, Lgals3, Gfra1  | 21.17607 |
| GO:0043235                | receptor complex                        | 0.0004241 | 0.005938 | Gfra1, Notch1, Notch2 | 18.57152 |
| GO:0031012                | extracellular matrix                    | 0.0006598 | 0.006928 | Icam1, Timp1, Lgals3  | 15.96724 |
| GO:0005578                | proteinaceous extracellular matrix      | 0.0077777 | 0.046666 | Timp1, Lgals3         | 14.47031 |
| <b>Molecular function</b> |                                         |           |          |                       |          |
| GO:0048018                | receptor ligand activity                | 0.000847  | 0.011758 | Ccl2, Timp1, Lgals3   | 14.65271 |
| GO:0030545                | receptor regulator activity             | 0.001042  | 0.011758 | Ccl2, Timp1, Lgals3   | 13.64435 |
| GO:0050839                | cell adhesion molecule binding          | 0.0011703 | 0.011758 | Icam1, Gfra1, F11r    | 13.10873 |
| GO:0005178                | integrin binding                        | 0.0012059 | 0.011758 | Icam1, Gfra1          | 37.43142 |
| GO:0005125                | cytokine activity                       | 0.0029236 | 0.016289 | Ccl2, Timp1           | 23.89689 |
| GO:0005030                | neurotrophin receptor activity          | 0.0023623 | 0.015355 | Gfra1                 | 422.975  |
| GO:0048020                | CCR chemokine receptor binding          | 0.0182965 | 0.039642 | Ccl2                  | 54.22756 |
| GO:0008191                | metalloendopeptidase inhibitor activity | 0.0051905 | 0.025304 | Timp1                 | 192.2614 |
| GO:0070492                | oligosaccharide binding                 | 0.0080117 | 0.033397 | Lgals3                | 124.4044 |
| GO:0019865                | immunoglobulin binding                  | 0.0089506 | 0.033397 | Lgals3                | 111.3092 |

Notes: Category refers to the GO functional categories.

**Table S8.** List of siRNA sequences used in this article.

| Name     | Sense (5'-3') primer  |
|----------|-----------------------|
| si RNA-1 | GCUCAUUGCUGGGUACUUATT |
| si RNA-2 | AUCAGUGAUGUUAACCUCCTC |
| si RNA-3 | UUGUGCAGAGGAACCAUCCTG |

**Table S9.** List of qPCR sequences used in this article.

| Gene symbol             | Primers sequence               |
|-------------------------|--------------------------------|
| <i>Rattus GAPDH-F</i>   | <i>GATGACATCAAGAAGGTGGTGA</i>  |
| <i>Rattus GAPDH-R</i>   | <i>ACCCTGTTGCTGTAGCCATATTC</i> |
| <i>Rattus IL-1 RA-F</i> | <i>GACATGGTGCCTATTGACTTTC</i>  |
| <i>Rattus IL-1 RA-R</i> | <i>GATTCGAAGCTGGTGGTAGG</i>    |
